# Supplementary material for: Perioperative Simulation-based Medical Education in China: A Nationwide Cross- sectional Survey
Source: Research Square preprint supplement (doi:10.21203/rs.3.rs-6948208/v1), 2025-08-05
Supplement: Supplementary file 1 [file bb5490b75890762a28ff8669.docx]

**General Information**

Question 1: I am aware and agree that the collected data may be used for research and analysis. [Single Choice]

Yes, I am aware and agree

No, I do not agree

Question 2: Your gender. [Single Choice]

Male

Female

Question 3: Your city. [Open-ended]

Question 4: Your highest level of education. [Single Choice]

Associate‘s Degree

Bachelor’s Degree

Master’s Degree

Doctor’s Degree

Question 5: Your current category. [Single Choice]

Doctor

Nurse

Manager

Question 6: Your current specialty. [Single Choice]

Anesthesiology department

Surgery department

Question 7: Your current professional title. [Single Choice]

Resident

Attending

Question 8: Number of years working: ______ years. [Open-ended]

Question 9: The level of your hospital. [Single Choice]

Tertiary hospital (Teaching Hospital)

Tertiary hospital (Non-Teaching Hospital)

Others

Question 10: Your role in current simulation teaching practices. [Multiple Choice]

Instructor

Learner (Participant/Observer)

Administrator (Department Head/Program Director/Teaching Director/Teaching Secretary)

Other

**Instructor part**

Question 11: Years of experience in simulation teaching. [Single Choice]

Less than 2 years

2-5 years

5-10 years

Over 10 years

Question 12: Before becoming an instructor, have you participated in professional simulation teaching training? [Single Choice]

Yes

No

Question 13: In the past two years, have you participated in academic activities related to simulation teaching? [Single Choice]

Yes

No

Question 14: The type of simulator commonly used in your base for simulation teaching. [Single Choice]

Standardized Patient

Simple Simulator

High-Fidelity mannequin

Other

Question 15: The usual location for conducting simulation teaching at your base. [Single Choice]

Simulation Operating Room

Simulation Ward

Simulation Resuscitation Room

Operating Room

Ward

Resuscitation Room

Classroom

Other

Question 16: The simulation teaching content at your base includes: [Multiple Choice]

Clinical Skills

Clinical Thinking

Crisis Management

Patient-doctor Communication

Teamwork

Leadership

Other

Question 17: Does your base offer interprofessional simulation courses? [Single Choice]

Yes

No

Question 18: The frequency of simulation courses at your base is: [Single Choice]

At least 2 times per month

1 time per month

1 time every 2-3 months

1-2 times per year

Occasionally, uncertian

Question 19: The course format for simulation teaching at your base is: [Single Choice]

Fixed teaching days, 1 session each time

Fixed teaching days, at least 2 sessions each time (not stratified by learner level)

Fixed teaching days, at least 2 sessions each time (stratified by learner level)

No fixed teaching days, 1 session each time

No fixed teaching days, at least 2 sessions each time (not stratified by learner level)

No fixed teaching days, at least 2 sessions each time (stratified by learner level)

Other

Question 20 Examples of crisis event simulations you have conducted include [Multiple choice]

Stroke

Chest pain

Severe trauma

Myocardial infarction

Pulmonary embolism

Amniotic fluid embolism

Cardiac arrest

Malignant hyperthermia

Anaphylactic Shock

Infectious Shock

Haemorrhagic Shock

Difficult airway

Bronchospasm

Reflux Misaspiration

Other

Question 21: The usual duration of each simulation session is: [Single Choice]

0.5 hours

0.5 to 1 hour

1 to 2 hours

More than 2 hours

Question 22: The typical number of learners in each simulation session is: [Single Choice]

Less than 5

5 to 8

9 to 15

More than 15

Question 23: The main considerations when designing a simulation lesson plan include: [Multiple Choice]

Scenario Overview

Target Audience

Learning Objectives

Key Events

Desired Outcomes (Knowledge, Skills, Attitudes)

Personnel, Equipment, and Environmental Information

Other

Question 24: Do you usually provide a prebriefing plan before running the simulation lesson plan? [Single Choice]

Yes

No

Question 25: Do you conduct course evaluations after simulation teaching? [Single Choice]

No

Yes, primarily instructor evaluations

Yes, primarily learner evaluations

Yes, primarily observer evaluations

Yes, collecting evaluations from different roles

Question 26: Do you make ongoing improvements to the simulation teaching course based on evaluation feedback? [Single Choice]

Yes

No

Question 27: Have you conducted or are you preparing to conduct research related to simulation teaching? [Single Choice]

Already conducting

Preparing to conduct

Interested, but no specific plan yet

No related plans

Question 28: Among the simulation teaching content, which do you think benefits learners the most? [Multiple Choice]

Clinical Skills

Clinical Thinking

Crisis Management

Patient-doctor Communication

Teamwork

Leadership

Other

Question 29: The main limiting factors for your simulation teaching courses are: [Multiple Choice]

Insufficient depth of knowledge

Lack of teaching skills

Incomplete teaching equipment and materials

Insufficient support from hospital/department levels

Time constraints

Other

Question 30: To effectively improve the quality of simulation teaching, which areas do you think can be improved? [Multiple Choice]

Professional course training

Continuous improvement of teaching faculty

Financial support

Increased teaching time

Gaining leadership attention

Establish standard processes

Increase learner motivation

Improve the configuration of instruments and equipment

Other

Learner part

Question 31: Your main reasons for participating in simulation teaching are: [Multiple Choice]

Active learning

Teaching requirements

Assessment tasks

Other

Question 32: Locations where you usually participate in simulation teaching courses: [Single Choice]

Simulation Operating Room

Simulation Ward

Simulation Resuscitation Room

Operating Room

Ward

Resuscitation Room

Classroom

Other

Question 33: Type of simulators/participants commonly used in your simulation teaching courses: [Single Choice]

Standardized Patient

Simple Simulator

High-Fidelity mannequin

Other

Question 34: Content areas you believe provide the greatest benefit from simulation teaching: [Multiple Choice]

Clinical Skills

Clinical Thinking

Crisis Management

Patient-doctor Communication

Teamwork

Leadership

Other

Question 35: Frequency of your participation in simulation teaching courses: [Single Choice]

At least 2 times per month

1 time per month

1 time every 2-3 months

1-2 times per year

Occasionally, uncertain

Question 36: Typical duration of the simulation teaching courses you participate in: [Single Choice]

Less than 0.5 hours

0.5 to 1 hour

1 to 1.5 hours

1.5 to 2 hours

More than 2 hours

Question 37: Average number of participants in the simulation teaching courses you attend: [Single Choice]

Less than 5

5 to 8

9 to 15

More than 15

Question 38: Is there a debriefing session in the simulation teaching courses you attend, and what is the main format? [Single Choice]

Debrief with instructor-led theoretical instruction

Debrief with instructor feedback and guidance

Debrief primarily through self-evaluation and summary by learners

Debrief through instructor questioning to guide reflection

No debrief

Question 39: Is there a course evaluation conducted after simulation teaching? [Single Choice]

No

Yes, primarily instructor evaluations

Yes, primarily learner evaluations

Yes, primarily observer evaluations

Yes, collecting evaluations from different roles

Question 40: What benefits do you think participating in simulation teaching courses can bring? [Multiple Choice]

Increased theoretical knowledge base

Improved clinical practice and skills

Enhanced clinical decision-making and critical thinking

Increased learning motivation

Improved communication skills

Enhanced teamwork abilities

Improved leadership skills

Other

Question 41: How satisfied are you with the simulation teaching work at your base? [Rating Scale]

Very dissatisfied

Dissatisfied

Neutral

Satisfied

Very satisfied

Question 42: Areas needing improvement in the simulation teaching at your base: [Multiple Choice]

Strengthening faculty expertise

Rational time planning

Enhancing teaching methods

Mimicking realistic environments

Improving instructors’ teaching styles and attitudes

Upgrading teaching resources (simulation operating rooms, high-fidelity simulators)

Authenticity of teaching materials

Other

**Administrator part**

Question 43: In which year did your base start simulation teaching? [Single Choice]

Before 2015

2015

2016

2017

2018

2019

2020

2021

2022

2023

2024

Unsure

Question 44: Number of instructors involved in simulation teaching at your base: [Single Choice]

Less than 3

4 to 6

7 to 10

More than 10

Question 45: Frequency of simulation teaching courses conducted at your base: [Single Choice]

At least 2 times per month

1 time per month

1 time every 2-3 months

1-2 times per year

Occasionally, unsure

Question 46: Main purposes for promoting simulation teaching: [Multiple Choice]

Clinical Teaching

Providing Clinical Feedback

Scientific Research

Mainstream Educational Trend

Other

Question 47: Significance of conducting simulation teaching: [Multiple Choice]

Improving clinical practice and skills

Enhancing clinical decision-making and thinking

Improving team communication and cooperation

Increasing learner motivation

Enhancing learner leadership skills

Improving humanitarian care and patient safety during surgery

Other

Question 48: Your attitude toward simulation teaching: [Multiple Choice]

Essential for medical education

Should be integrated into routine clinical teaching

Question 49: Current shortcomings in simulation teaching at your base: [Multiple Choice]

Teaching space resources (simulation operating room, control room, debriefing room, skills training room, practice room, etc.)

Configuration of teaching simulators (simple and high-fidelity simulators, VR, etc.)

Management system

Process and policies

Financial support

Faculty expertise

Simulation technical professionals

Other

Question 50: Suggested measures to further improve simulation teaching at your base: [Multiple Choice]

Improve teaching hardware and software facilities

Strengthen faculty expertise

Increase learner engagement

Establish a simulation teaching assessment system

Regular feedback and improvements based on evaluations

Other

Question 51: Does your base conduct simulation teaching? [Single Choice]

Yes

No

Question 52: Have you participated in simulation teaching? [Single Choice]

Yes

No
